# Supplementary material for: Benzisothiazolinone: Pharmacokinetics, Tissue Distribution, and Mass Balance Studies in Rats
Source: MDPI journal article supplement (doi:10.3390/metabo13050584), 2023-04-23
Supplement: s1 [file s1]

## Supplementary Material, Text S1

### Benzisothiazolinone: Pharmacokinetics, Tissue Distribution, and Mass Balance studies in Rats

Seong Jun Jo <sup>1,†</sup>, Soo Hyeon Bae <sup>2,†,‡</sup>, Zhouchi Huang <sup>1</sup>, Sangyoung Lee <sup>1</sup>, Chae Bin Lee <sup>1</sup>, Soon Uk Chae <sup>1</sup>, Jung Bae Park <sup>2</sup>, Mihye Kwon <sup>2</sup>, Hye Kyung Chung <sup>2</sup> and Soo Kyung Bae <sup>1,\*</sup>

#### Determination of the unbound fraction of BIT in rat plasma

##### Materials & Method

The plasma protein bindings were performed using a rapid equilibrium dialysis device and cellulose membranes with a molecular weight cutoff of 8000 (Thermo Scientific, Rockford, IL, USA) [1]. The rat plasma samples containing BIT at 5 and 50  $\mu\text{M}$ , respectively, were dialyzed against a dialysis buffer, phosphate-buffered saline (PBS, 400  $\mu\text{L}$ ). The loaded dialysis plate was covered with sealing tape, placed on an orbital shaker at approximately 200 rpm, and incubated at 37 °C for 4 h. Thereafter, samples (100  $\mu\text{L}$ ) from both PBS and plasma chambers were collected and mixed with an equal volume of blank plasma and PBS, respectively. All samples were stored at -80 °C until LC-MS/MS analysis. The unbound fraction of BIT in rat plasma was calculated by dividing the BIT concentration in PBS by that in plasma.

##### Result

BIT was extensively bound to rat plasma proteins. The free fractions (%) of BIT at 5 and 50  $\mu\text{M}$  in rat plasma were  $0.562 \pm 0.0152\%$  and  $0.606 \pm 0.0416\%$ , respectively, ( $n = 3$ , respectively).

[1] Cho D.Y., Bae S.H., Lee J.K., Kim Y.W., Kim B.T., Bae S.K. Selective inhibition of cytochrome P450 2D6 by Sarpogrelate and its active metabolite, M-1, in human liver microsomes. *Drug Metab. Dispos.* 2014;42:33–39. doi: 10.1124/dmd.113.054296.
