# Supplementary material for: Benzisothiazolinone: Pharmacokinetics, Tissue Distribution, and Mass Balance Studies in Rats
Source: MDPI journal article supplement (doi:10.3390/metabo13050584), 2023-04-23
Supplement: s1 [file s1]

## Supplementary Table

### **Benzisothiazolinone: Pharmacokinetics, Tissue Distribution, and Mass Balance studies in Rats**

Seong Jun Jo <sup>1,†</sup>, Soo Hyeon Bae <sup>2,†,‡</sup>, Zhouchi Huang <sup>1</sup>, Sangyoung Lee <sup>1</sup>, Chae Bin Lee <sup>1</sup>, Soon Uk Chae <sup>1</sup>, Jung Bae Park <sup>2</sup>, Mihye Kwon <sup>2</sup>, Hye Kyung Chung <sup>2</sup> and Soo Kyung Bae <sup>1,\*</sup>

Table S1. Survival rate in rat after oral administration of BIT at 50 mg/kg/day for 7 days

| Day (Number of dose) | Survivors ( <i>n</i> ) | Survival rate (%) |
|----------------------|------------------------|-------------------|
| 0 (1 <sup>th</sup> ) | 8/8                    | 100               |
| 1 (2 <sup>nd</sup> ) | 7/8                    | 87.5              |
| 2 (3 <sup>rd</sup> ) | 4/8                    | 50                |
| 3 (4 <sup>th</sup> ) | 1/8                    | 12.5              |
